# Supplementary material
Source: MDPI journal article supplement (https://www.mdpi.com/2673-4125/1/2/18)
Supplement: s1 [file s1]

# Modelling the activation pathways in full length Src kinase

Josephine Alba<sup>‡</sup>, Maria Montagna <sup>‡,¶</sup>, and Marco D'Abramo<sup>\*,‡</sup>

<sup>‡</sup>Department of Chemistry, Sapienza University of Rome, Italy

<sup>¶</sup>Dept. of Information Engineering, Electronics and Telecommunications, Sapienza University of Rome, Italy

E-mail: marco.dabramo@uniroma1.it

**Tab.1S**

| <b>SH2-KD<br/>(Closed Apo)</b> | <b>SH3-KD<br/>(Closed Apo)</b> | <b>SH3-Linker<br/>(Closed Apo)</b> |
|--------------------------------|--------------------------------|------------------------------------|
| 155R 526Q                      | 95R 287N                       | 95R 252T                           |
| 160R 365D                      | 95R 289T                       | 95R 255L                           |
| 160R 397N                      | 117D 318R                      | 118W 253Q                          |
| 179T 527Y                      | —                              | 135N 251Q                          |
| 200K 528Q                      | —                              | 91D 249K                           |
| 217R 531E                      | —                              | 117D 253Q                          |
| 157E 321K                      | —                              | 115E 257K                          |
| 201H 527Y                      | —                              | —                                  |
| 237L 532N                      | —                              | —                                  |

Hydrogen bonds (HB) in c-Src domains, for the Closed Apo conformation. HB among the residues of SH2 and KD domains (column 1), of SH3 and KD domains (column 2), and of SH3 and linker domains (column 3) are reported.

**Tab.2S**

| <b>SH2-KD<br/>(Open)</b> | <b>SH3-KD<br/>(Open)</b> | <b>SH3-Linker<br/>(Open)</b> |
|--------------------------|--------------------------|------------------------------|
| —                        | 11R 221E                 | 11R 168T                     |
| —                        | 32G 247E                 | 12T 174D                     |

|   |          |          |
|---|----------|----------|
| — | 13E 228N | 14T 173K |
| — | 13E 231K | 34W 169Q |
| — | —        | 51N 167Q |
| — | —        | 52Y 166P |
| — | —        | 7D 165K  |
| — | —        | 51N 168T |
| — | —        | 31E 173K |

Hydrogen bonds (HB) among c-Src domains, for the Open conformation. No HB among the residues of SH2 and KD domains have been identified (column 1). HB among the residues of SH3 and KD domains (column 2), and of SH3 and linker domains (column 3) are reported.

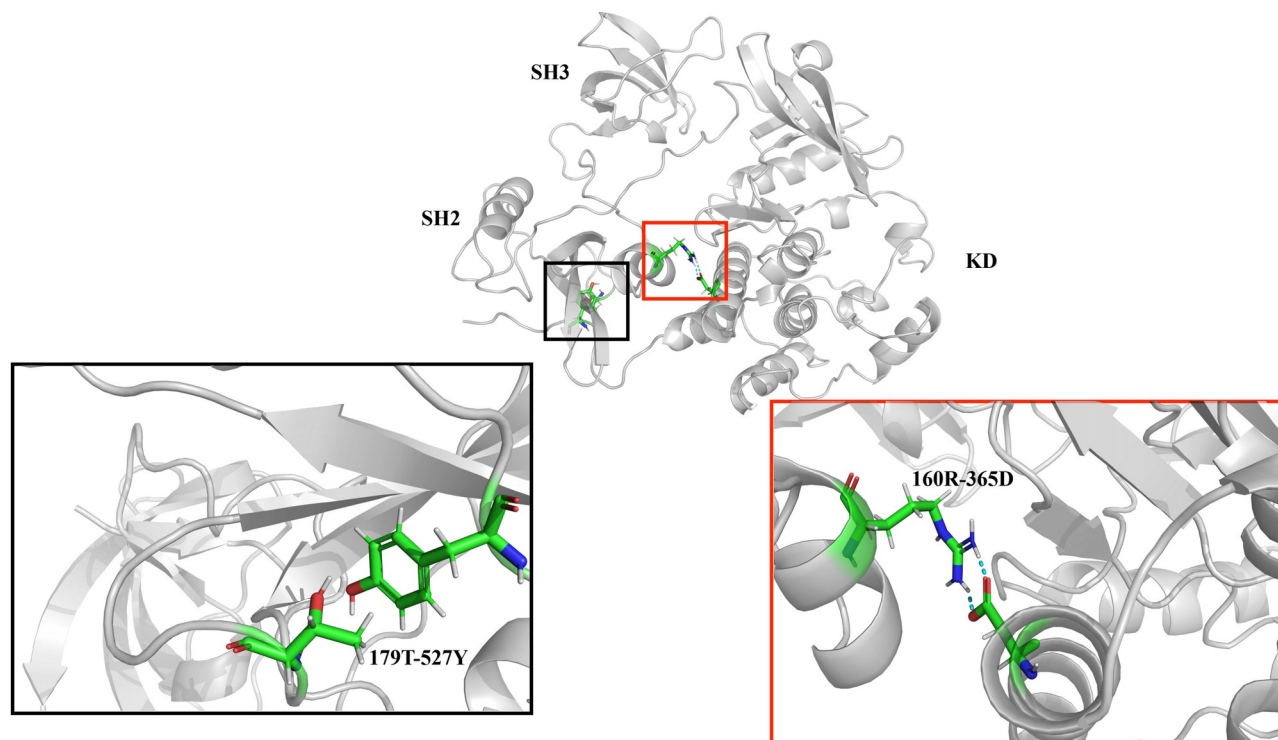

**Fig. 1S** HB between the residues **179T-527Y** (black box) and **160R-365D** (red box) stabilizing c-Src in close conformation. The residues **179T** and **160R** belong to SH2 domain, the residues **527Y** and **365D** belong to KD domain.

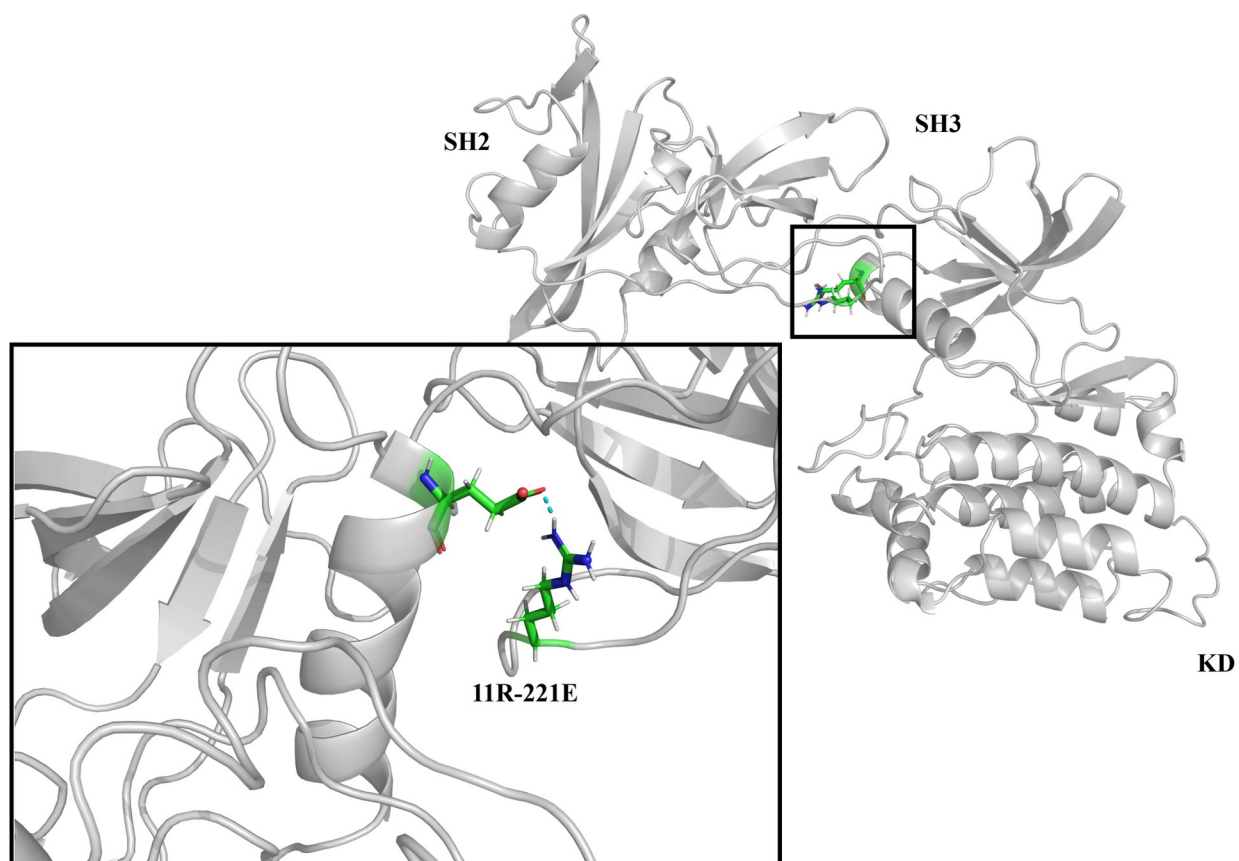

**Fig. 2S** HB between the residues **11R-221E** belonging, respectively, to SH3 and KD domains for c-Src in Open conformation.
